# Supplementary material for: Chiral nanostructures self-assembled from nitrocinnamic amide amphiphiles: substituent and solvent effects
Source: publisher site journal article supplement (doi:10.3762/bjnano.10.156), 2019-08-05
Supplement: Additional file 1 [file 2190-4286-10-156-S1.pdf]

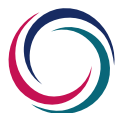

## Supporting Information

for

### **Chiral nanostructures self-assembled from nitrocinnamic amide amphiphiles: substituent and solvent effects**

Hejin Jiang, Huahua Fan, Yuqian Jiang, Li Zhang and Minghua Liu

*Beilstein J. Nanotechnol.* **2019**, *10*, 1608–1617. doi:10.3762/bjnano.10.156

## Additional experimental data

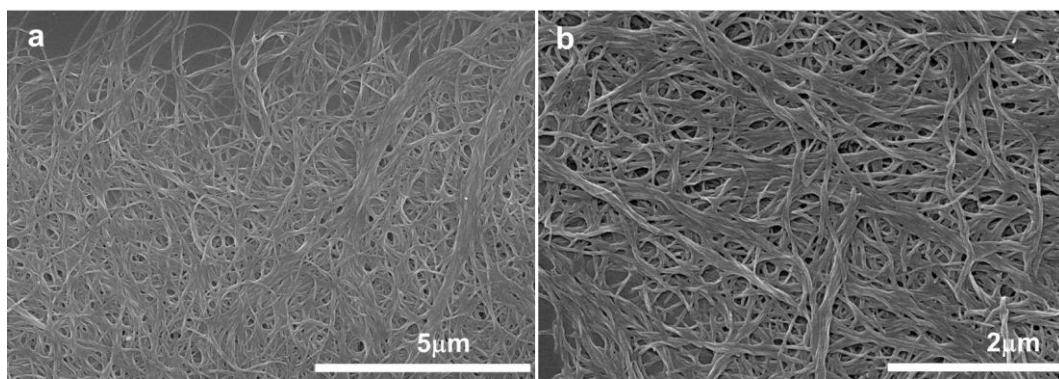

**Figure S1:** SEM images of NCLG assemblies in EtOH: (a) 2NCLG, (b) 4NCLG. The concentration is 12 mg/mL.

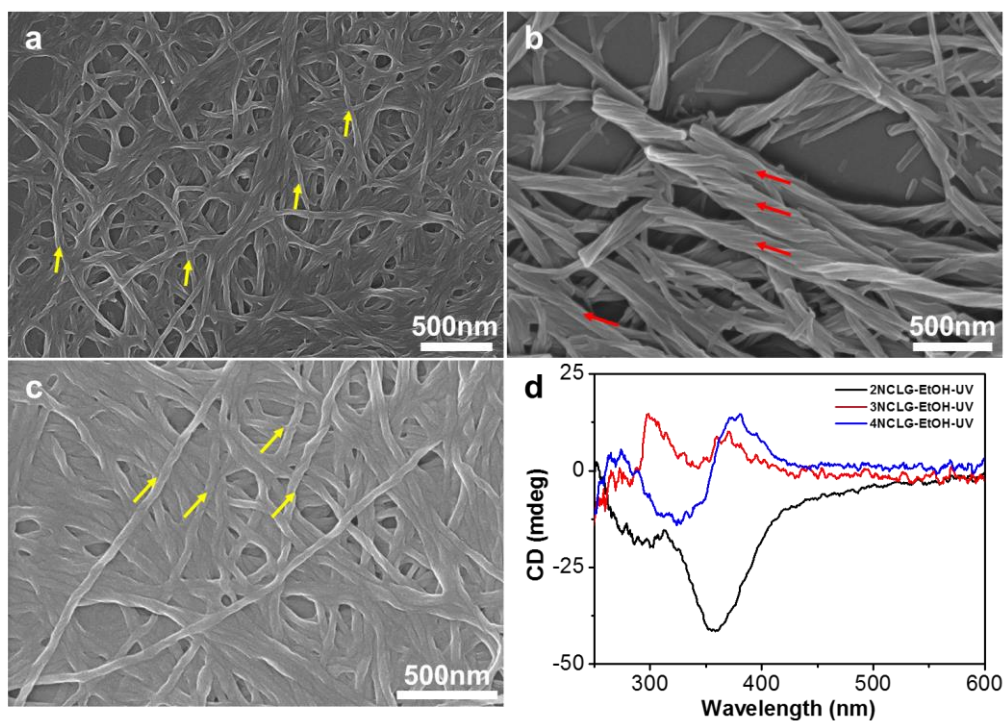

**Figure S2:** SEM images of NCLG assemblies in EtOH after UV light irradiation: (a) 2NCLG, (b) 3NCLG, (c) 4NCLG. The concentration is 12 mg/mL. (d) CD spectra of NCLG assemblies in EtOH after UV light irradiation.

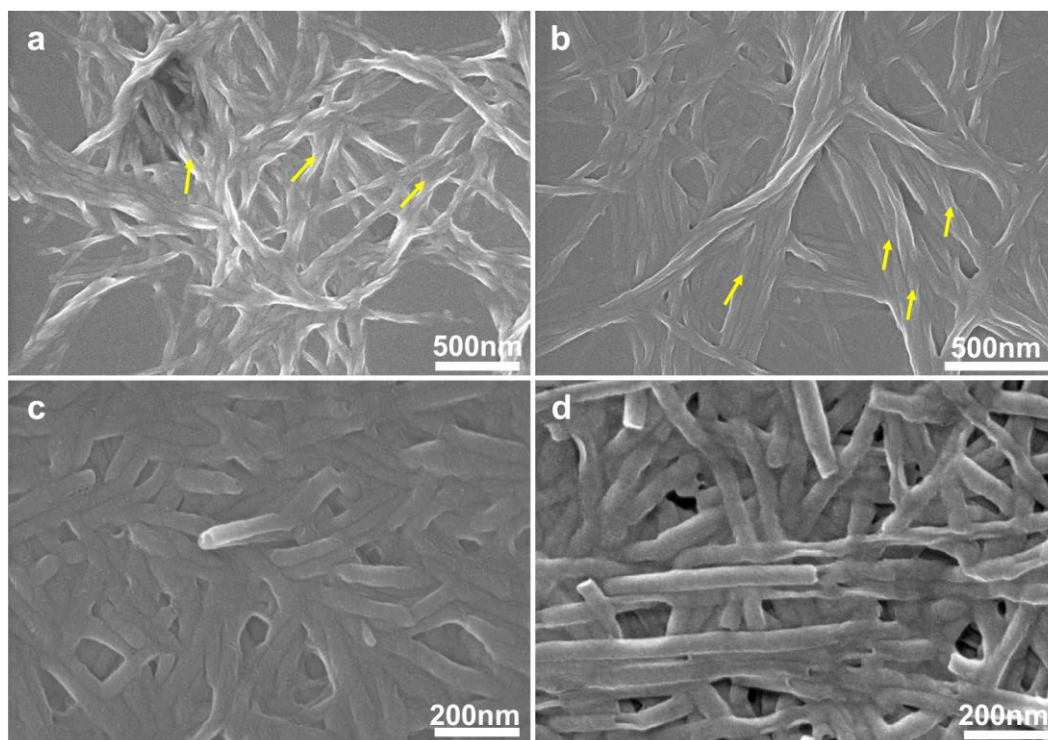

**Figure S3:** SEM images of 2NCLG assemblies in (a) DMF, (b) THF and 3NCLG assemblies in (c) DMF and (d) THF. The concentration is 12 mg/mL.
